# Supplementary material for: Sulfation of O-glycans on Mucin-type Proteins From Serous Ovarian Epithelial Tumors
Source: PubMed Central journal article supplement (PMC8527052; doi:10.1016/j.mcpro.2021.100150), 2021-09-21
Supplement: mmc1.pdf [file mmc1.pdf]

# A Gal3ST4

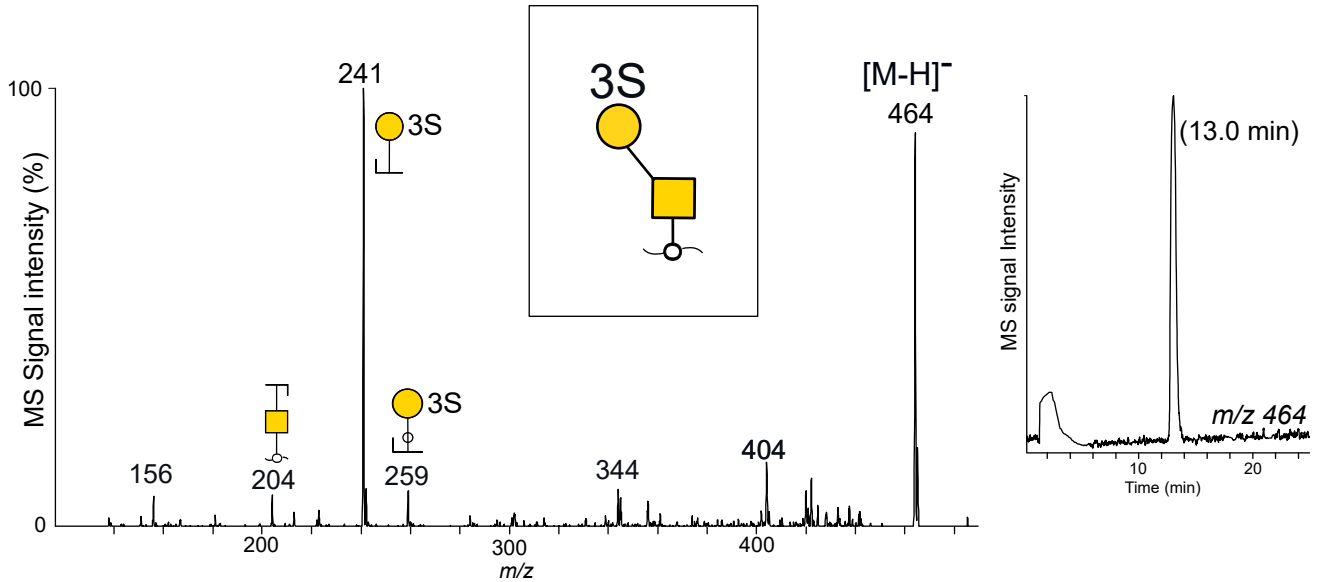

# B CHST1

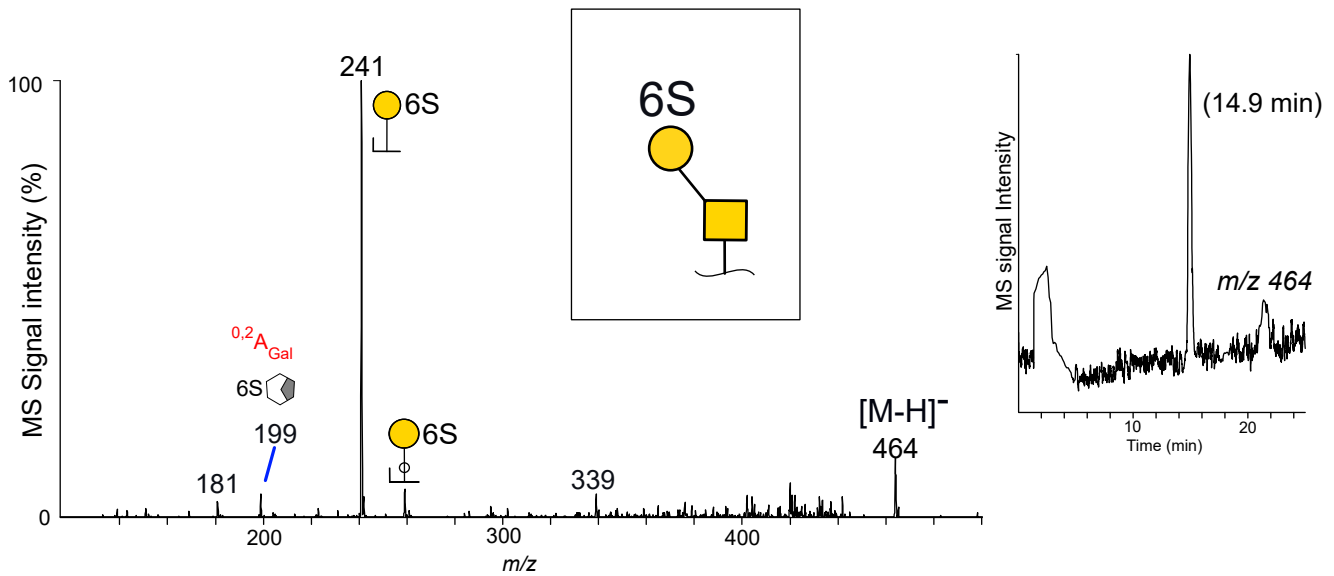

Supplemental Figure 1 LC- MS<sup>2</sup> spectra of sulfated core 1 O-glycans collected after fragmentation of the precursor ion at  $m/z$  464 ( $[M-H]^-$ ) from recombinantly produced PSGL-1/mIgG2b protein purified from CHO cells. PSGL-1 was co-transfected with Gal3ST4 (A) or CHST1 (B). Included in each figure is EIC of  $m/z$  464 from LC-MS run. For key of symbols, see Figure 1.

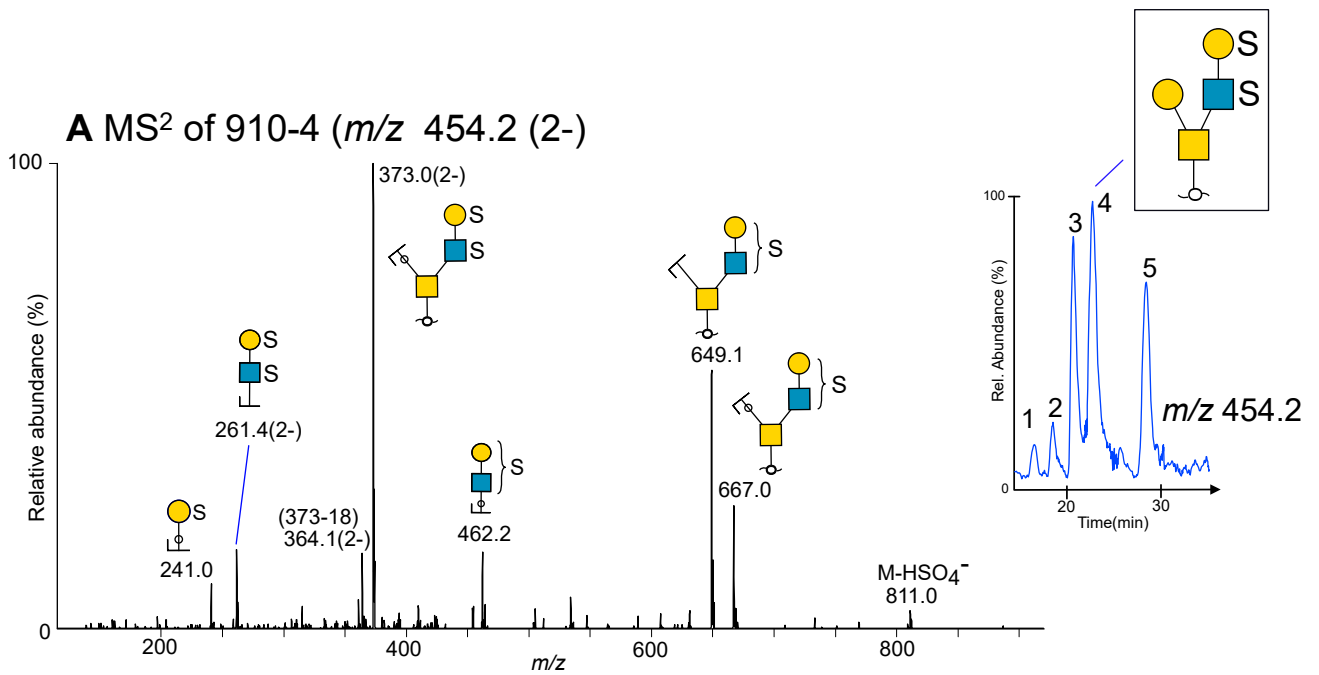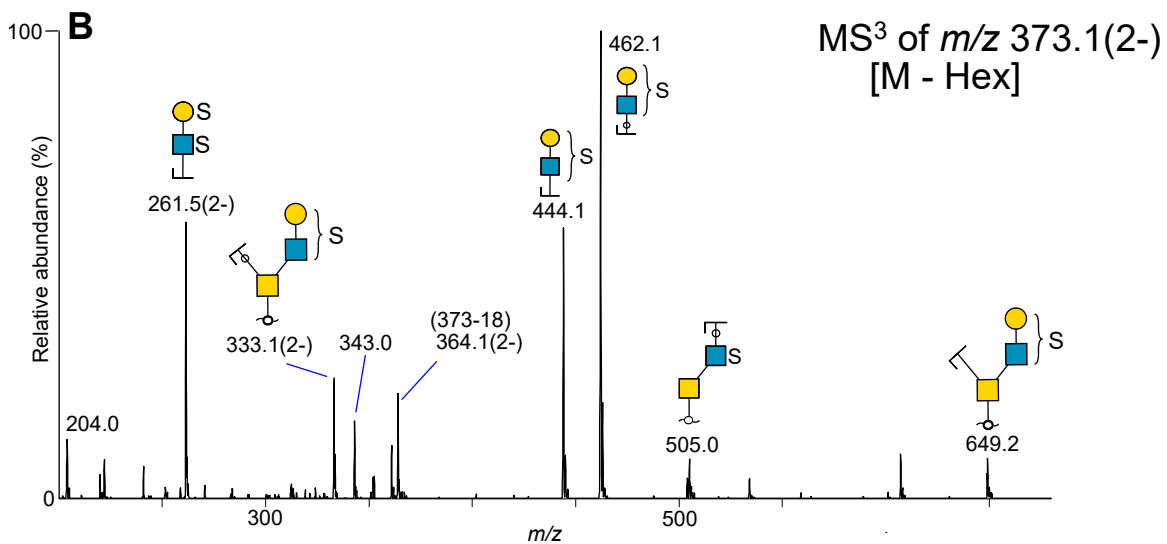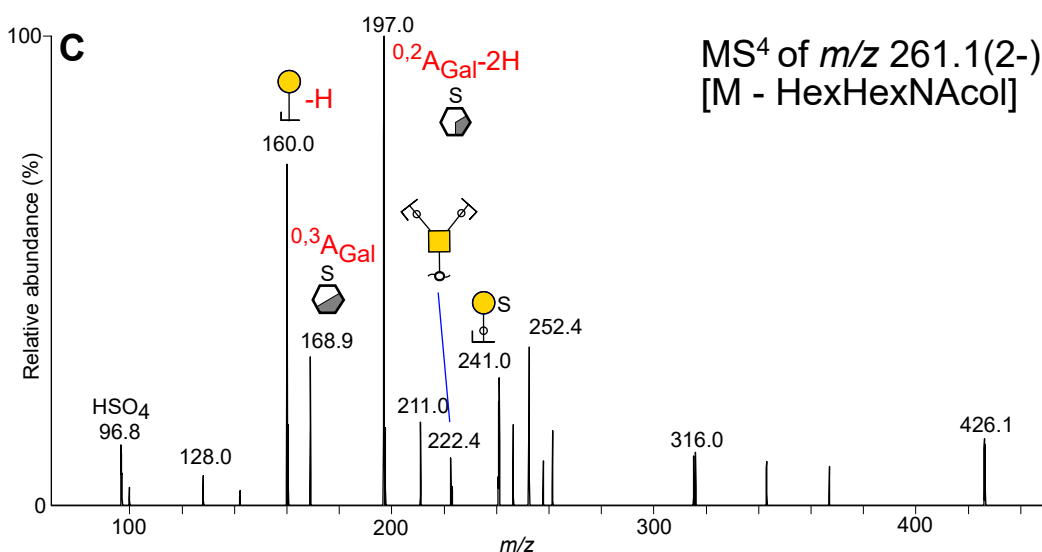

Supplemental Figure 2 Fragmentation of the disulfated isomer 910-4. Glycan sequence was interpreted from MS<sup>2</sup>, MS<sup>3</sup> and MS<sup>4</sup> experiments. (A) MS<sup>2</sup> spectrum of parent detected as [M-2H]<sup>2-</sup> ions at *m/z* 454.2<sup>2-</sup> (inserted EIC). Fragment ions are annotated with proposed compositions. For some fragment ions, more than one composition may be possible. (B) MS<sup>3</sup> spectrum of the *m/z* 373.0<sup>2-</sup> from the MS<sup>2</sup> experiment shown in (A). (C) MS<sup>4</sup> spectra of the ions at *m/z* 261.1<sup>2-</sup> from the MS<sup>3</sup> experiment shown in (B). For key of symbols, see Figure 1.

| $m/z$<br>[ $M-xH$ ] <sup>x-</sup> | PSGL-1/mIgG2b<br>+ GCNT1 <sup>1</sup>                                                   | + GAL3ST2                                                                               | + GAL3ST4                                                                                | + CHST1                                                                                   |
|-----------------------------------|-----------------------------------------------------------------------------------------|-----------------------------------------------------------------------------------------|------------------------------------------------------------------------------------------|-------------------------------------------------------------------------------------------|
| 675                               | 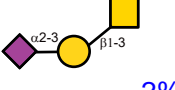 2%    |  8%    |  11%   |  10%   |
| 749                               |  1%    |                                                                                         |  6%    |  6%    |
| 878                               |  2%    |  6%    |  8%    |  5%    |
| 1040                              |  39%   |                                                                                         |  40%   |  24%   |
| 1331                              |  54% |                                                                                         |  30% |  16% |
| 829                               |                                                                                         |  6%  |  5%  |  3%  |
| 1120                              |                                                                                         |  79% |                                                                                          |  20% |
| 599                               |                                                                                         |                                                                                         |                                                                                          |  17% |

Supplemental Figure 3 Table of glycans detected after transfection of CHO-cells with PSGL-1/mIgG2b and GCNT1 constructs together with constructs for sulfotransferases. Included is also the relative abundance as measured by their ion intensity of parent ions from the LC-MS runs. For key of symbols, see Figure 1.
